# Supplementary material for: L-glutamine Induces Expression of Listeria monocytogenes Virulence Genes
Source: PubMed Central journal article supplement (PMC5289647; doi:10.1371/journal.ppat.1006161), 2017-01-23
Supplement: ppat.1006161.s009.pdf [file ppat.1006161.s009.pdf]

## Supplementary Table 1 Strains used in this study

| Strain                                                              | Source                                                                                                                                                                                                                    |
|---------------------------------------------------------------------|---------------------------------------------------------------------------------------------------------------------------------------------------------------------------------------------------------------------------|
| <i>L. monocytogenes</i> 10403S                                      | Daniel Portnoy Stock                                                                                                                                                                                                      |
| <i>L. monocytogenes</i> 10403S $\Delta$ <i>glnPQ</i>                | This study                                                                                                                                                                                                                |
| <i>L. monocytogenes</i> 10403S $\Delta$ <i>glnPQ</i> E164A          | This study                                                                                                                                                                                                                |
| <i>L. monocytogenes</i> 10403S $\Delta$ <i>glnPQ</i> P <i>glnPQ</i> | This study                                                                                                                                                                                                                |
| <i>E. Coli</i> SM10                                                 | R. Simon, U. Prierer A. Pühler (1983) A Broad Host Range Mobilization System for <i>In Vivo</i> Genetic Engineering: Transposon Mutagenesis in Gram Negative Bacteria<br><i>Nature Biotechnology</i> <b>1</b> , 784 - 791 |
