# Supplementary material for: L-glutamine Induces Expression of Listeria monocytogenes Virulence Genes
Source: PubMed Central journal article supplement (PMC5289647; doi:10.1371/journal.ppat.1006161), 2017-01-23
Supplement: ppat.1006161.s010.pdf [file ppat.1006161.s010.pdf]

## Supplementary Table 2 Oligonucleotides used in this study

---

### Construction of strains

---

|                                |                                                 |
|--------------------------------|-------------------------------------------------|
| del- <i>LMRG_02270-1</i> A     | AAAATCTAGAAGGGACGAGCTACCCATATA                  |
| del- <i>LMRG_02270-1</i> B     | GTCATCTTGCTTTTCTGTTTATAACTTCATATTGTGTCTCCCTCTAT |
| del- <i>LMRG_02270-1</i> C     | ATAGAGGGAGGACACAATATGAAGTTATAAACGAAAAGCAAGATGAC |
| del- <i>LMRG_02270-1</i> D     | AAAACCCGGGCCATCTGGTTCAAGTTCTGG                  |
| <i>glnPQ</i> complementation F | TTTTGGTACCGCTTATATTGCATACGCAAAAATG              |
| <i>glnPQ</i> complementation R | TTTTGAGCTCTGCTTTTGGAAATTCCAAAGTCATC             |
| <i>LMRG_02271 E164A</i> A      | AAAATACGTAGTACTTGGACATGGCTAATCATC               |
| <i>LMRG_02271 E164A</i> B      | GATCGAGGGCTGATGTAGGTGCATCGAACAACATAATGTCAGGATC  |
| <i>LMRG_02271 E164A</i> C      | GATCCTGACATTATGTTGTTTCGATGCACCTACATCAGCCCTCGATC |
| <i>LMRG_02271 E164A</i> D      | TTTTTACGTACTGGATGCTGTCGTAACAATTG                |
| pPL2_ <i>yfp</i> A             | ATATGGGCCCGGGTTTCACTCTCCTTCTACATT               |
| pPL2_ <i>yfp</i> B             | ACCTCCTTAGCTAGCAATGGCCCCCTCCTT                  |
| pPL2_ <i>yfp</i> C             | AAGGAGGGGGCCATTGCTAGCTAAGGAGGT                  |
| pPL2_ <i>yfp</i> D             | AATTCGGCCGTAAAGCTTTTTATACAGTTCGT                |

---

**Supplementary Table 2 continued- Oligonucleotides used in this study**

---

**SBP point mutation**

---

SBP-R105A            TGGCATGTCTATTACCGACGAAGCTAAACAAAAATTTGATTTTCAGCG

SBP-R105A - RC      CGCTGAAATCAAATTTTTGTTTAGCTTCGTCGGTAATAGACATGCCA

---

**Macrophage gene expression RT-qPCR**

---

*IFN- $\beta$*  F            CCA AGA AAG GAC GAA CAT TCG*IFN- $\beta$*  R            CCG CCC TGT AGG TGA GGT T*GAPDH* F            TTGTGGAAGGGCTCATGACC*GAPDH* R            TCTTCTGGGTGGCAGTGATG*IL-6* F              TTCCATCCAGTTGCCTTCTTG*IL-6* R              GAAGGCCGTGGTTGTCACC

---

**Bacterial gene expression RT-qPCR**

---

*rpoD* F              GTGATCGGACGGTGAAGTTG*rpoD* R              ATCGCACAAGAGCCAGTTTC*hly* F                AAACACGCGGATGAAATCGA*hly* R                TAACCTTTTCTTGGCGGCAC*plcA* F              ATGTCCACGTCATGTCTCCG*plcA* R              GGATGTCCGCTCTACCTGAC*actA* F              CGTCGTCGGATAGTGAGCTT*actA* R              CCACA ACTGACTCTTTGCGCC*plcB* F              GCAACGGAAGACATGGTAGC*plcB* R              TAGTCCGCTTTGCGCCTTTT

---
